# Supplementary material for: Ambipolar solution-processed hybrid perovskite phototransistors
Source: PubMed Central journal article supplement (PMC4569843; doi:10.1038/ncomms9238), 2015-09-08
Supplement: ncomms9238-s1.pdf [file ncomms9238-s1.pdf]

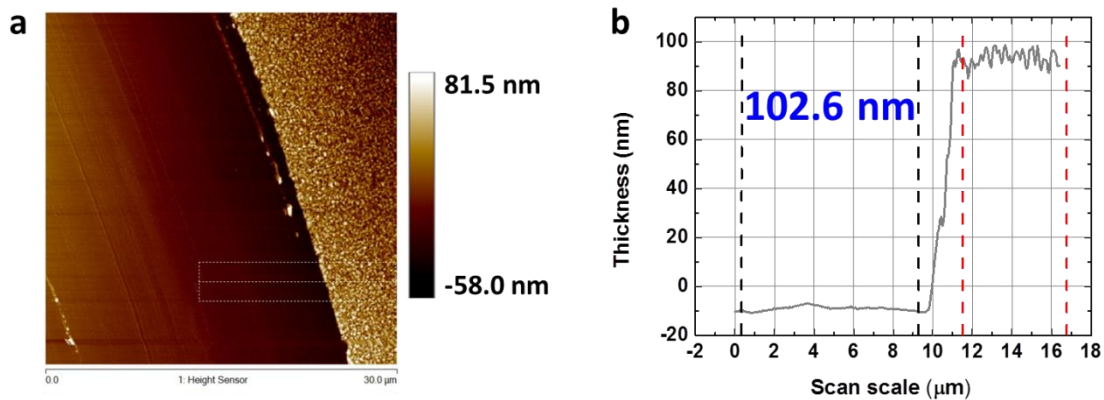

**Supplementary Figure 1. Film thickness measurement.** (a) AFM images of the perovskite film with a straight edge which was created by scratching with a tweezer. (b) Profile along the line highlighted in (a). This profile was used to estimate the thickness of the perovskite film.

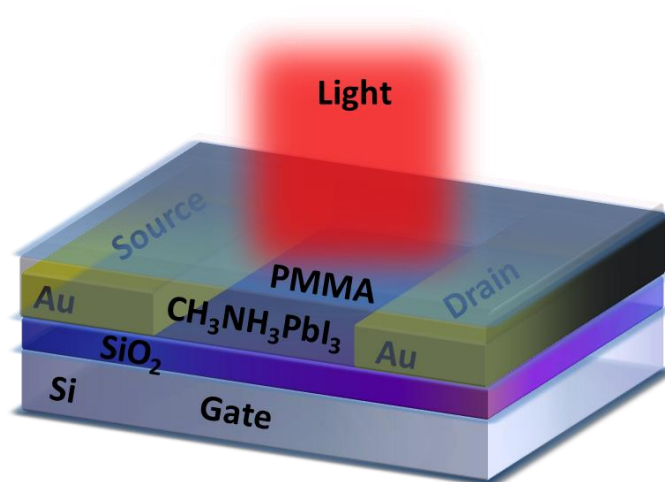

**Supplementary Figure 2. Device schematic.** Schematic diagram for a CH<sub>3</sub>NH<sub>3</sub>PbI<sub>3</sub>-based phototransistor with the bottom-gate bottom-contact structure.

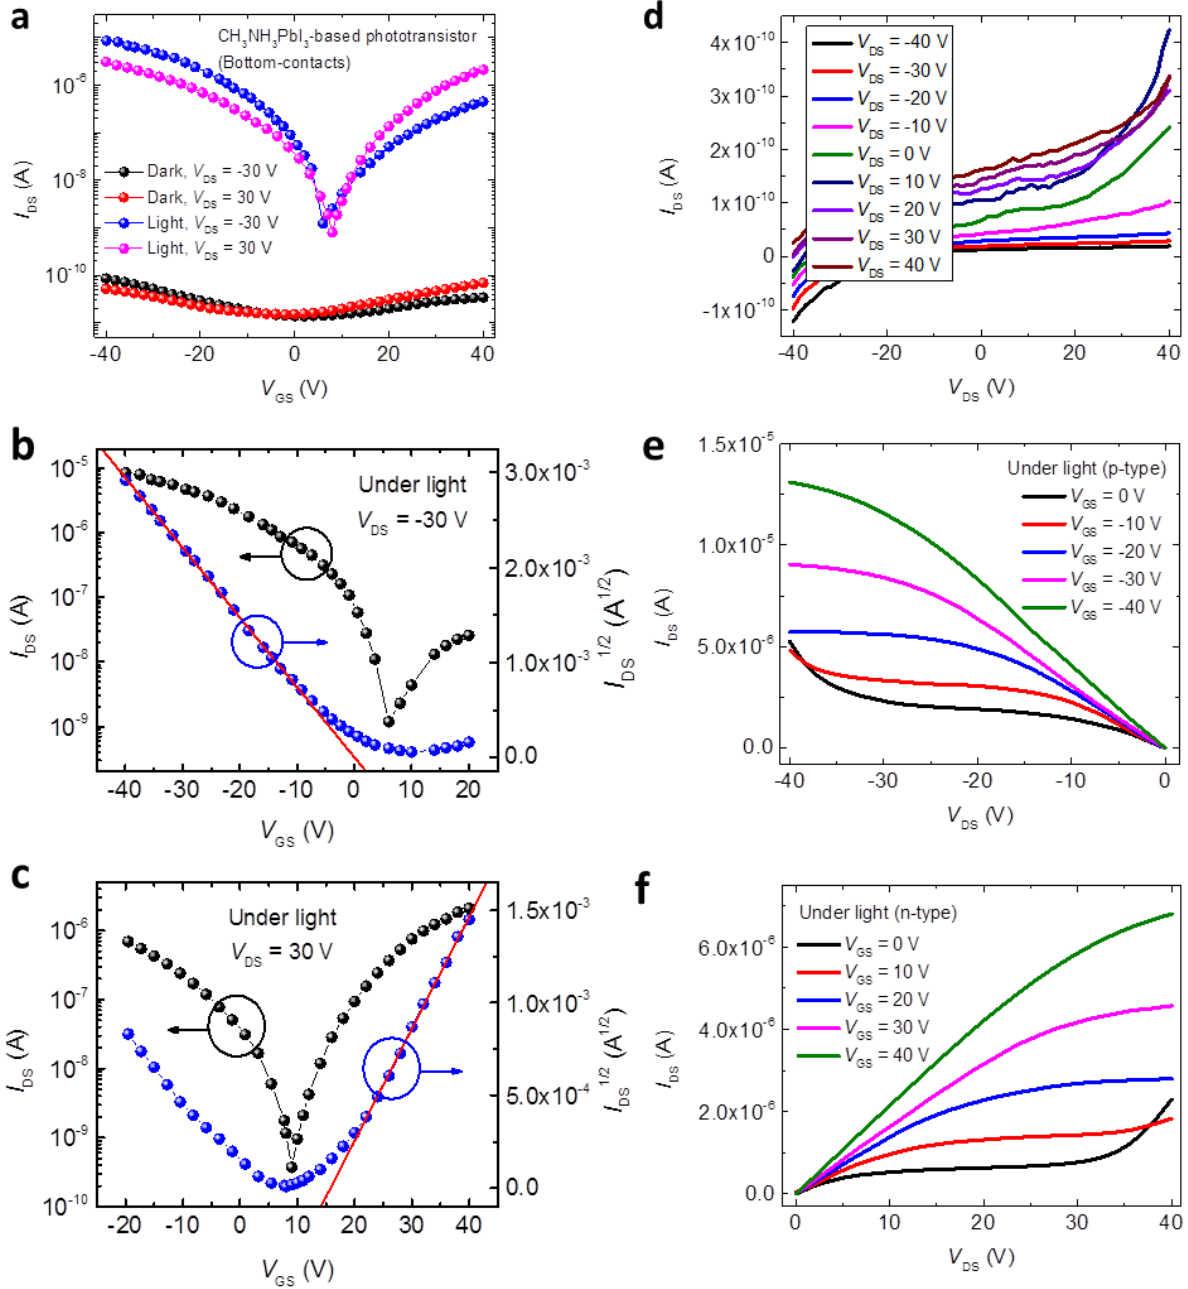

**Supplementary Figure 3. Performance of the bottom-gate, bottom-contact perovskite phototransistors. (a)** Transfer curves for the bottom-gate, bottom-contact phototransistor device. **(b)** and **(c)** represent, respectively, the transfer characteristics of p-type behavior and n-type behavior. **(d)**, **(e)** and **(f)** are output curves of the phototransistor in dark and under light illumination.

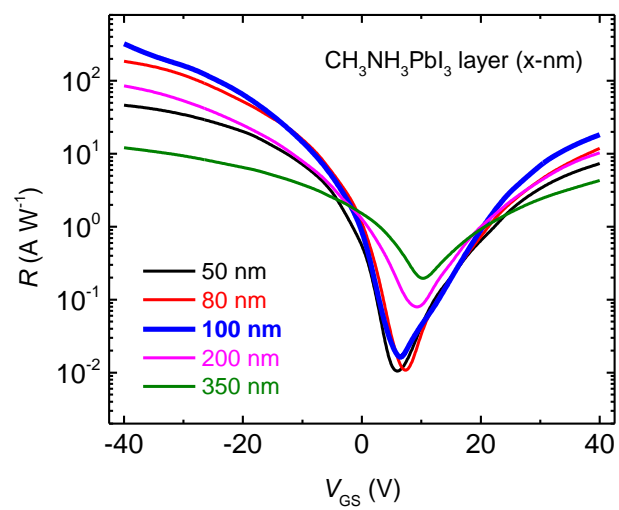

**Supplementary Figure 4. Photoresponsivity of the devices with various film thicknesses.**

The device with a thickness of about 100 nm was found to present the optimal performance.

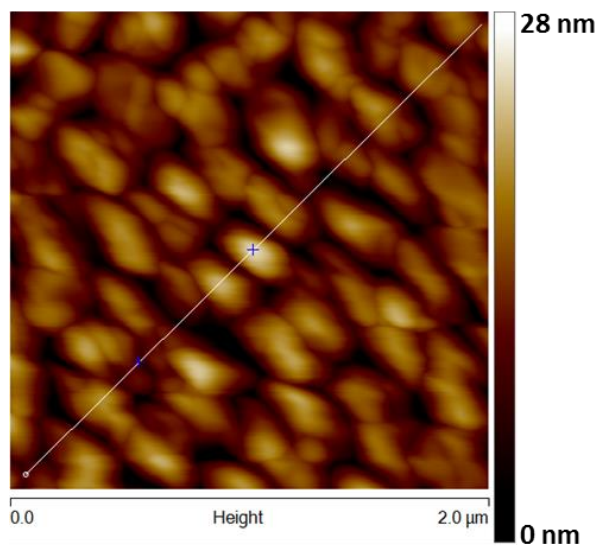

**Supplementary Figure 5. Atomic force microscopy (AFM) characterization of the  $\text{CH}_3\text{NH}_3\text{PbI}_{3-x}\text{Cl}_x$  film surface.** The root-mean square roughness is approximately 8.95 nm, demonstrating a smoother surface compared to the  $\text{CH}_3\text{NH}_3\text{PbI}_3$  film (shown in [Fig. 1d](#) in the main text).

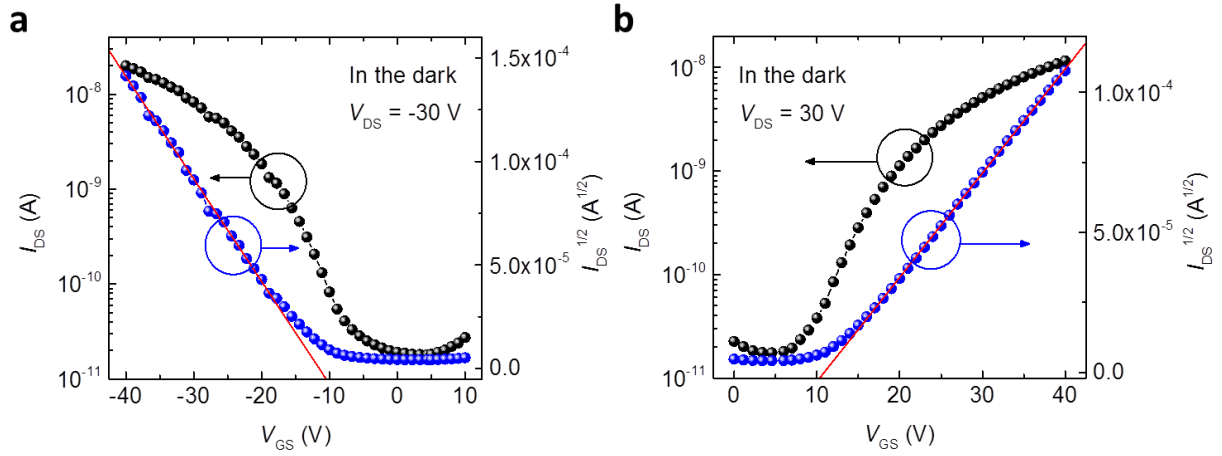

**Supplementary Figure 6. Transfer curves of a hybrid perovskite  $\text{CH}_3\text{NH}_3\text{PbI}_{3-x}\text{Cl}_x$ -based phototransistor in the dark.** (a) and (b) represent the transfer characteristics of a hybrid perovskite  $\text{CH}_3\text{NH}_3\text{PbI}_{3-x}\text{Cl}_x$ -based phototransistor in the p-type and n-type regimes, respectively.

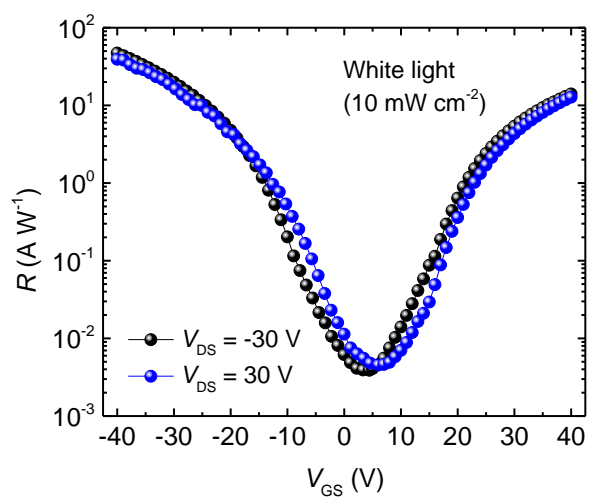

**Supplementary Figure 7. Photoresponsivity ( $R$ ) data.** Photoresponsivity ( $R$ ) measured on the perovskite CH<sub>3</sub>NH<sub>3</sub>PbI<sub>3-x</sub>Cl<sub>x</sub>-based phototransistor.

## Supplementary Table

**Supplementary Table 1. Performance of reported photodetectors based on hybrid perovskites.**

| Ref. | Year | Materials                                                                | Configuration   | Responsivity<br>(A W <sup>-1</sup> )   | Detectivity<br>(Jones) | Response<br>time |
|------|------|--------------------------------------------------------------------------|-----------------|----------------------------------------|------------------------|------------------|
| 1    | 2014 | CH <sub>3</sub> NH <sub>3</sub> PbI <sub>3</sub> film                    | solar cell      | Photocurrent<br>amplification<br>> 100 |                        |                  |
| 2    | 2014 | CH <sub>3</sub> NH <sub>3</sub> PbI <sub>3</sub> /TiO <sub>2</sub> film  | photodetector   | 0.49 × 10 <sup>-6</sup>                |                        | 0.02 s           |
| 3    | 2014 | CH <sub>3</sub> NH <sub>3</sub> PbI <sub>3</sub> film                    | photodetector   | 3.49                                   |                        | < 0.2 s          |
| 4    | 2014 | CH <sub>3</sub> NH <sub>3</sub> PbI <sub>3-x</sub> Cl <sub>x</sub> film  | photodetector   |                                        | ~10 <sup>14</sup>      | 160 ns           |
| 5    | 2014 | CH <sub>3</sub> NH <sub>3</sub> PbI <sub>3</sub> nanowires               | phototransistor | 5 × 10 <sup>-3</sup>                   |                        | < 500 μs         |
| 6    | 2015 | CH <sub>3</sub> NH <sub>3</sub> PbI <sub>3</sub> film                    | photodetector   | 14.5                                   |                        | 0.2 μs           |
| 7    | 2015 | Graphene- CH <sub>3</sub> NH <sub>3</sub> PbI <sub>3</sub><br>composites | phototransistor | 180                                    | ~10 <sup>9</sup>       | 87 ms            |
| 8    | 2015 | CH <sub>3</sub> NH <sub>3</sub> PbI <sub>3</sub> film                    | photodetector   | 242                                    |                        | 5.7 ± 1.0 μs     |
| 9    | 2015 | CH <sub>3</sub> NH <sub>3</sub> PbI <sub>3</sub> film                    | photodiode      |                                        | 3 × 10 <sup>12</sup>   | < 5 μs           |
| 10   | 2015 | CH <sub>3</sub> NH <sub>3</sub> PbI <sub>3</sub> film                    | photodetector   |                                        | 7.4 × 10 <sup>12</sup> | 120 ns           |
| 11   | 2015 | CH <sub>3</sub> NH <sub>3</sub> PbI <sub>3</sub> film                    | optocoupler     | 1.0                                    |                        | 20 μs            |
| 12   | 2015 | CH <sub>3</sub> NH <sub>3</sub> PbI <sub>3</sub> nanowires               | photodetector   | 1.3                                    | 2.5 × 10 <sup>12</sup> | 0.3 ms           |



## Supplementary References

1. Moehl, T. *et al.* Strong photocurrent amplification in perovskite solar cells with a porous TiO<sub>2</sub> blocking layer under reverse bias. *J. Phys. Chem. Lett.* **5**, 3931–3936 (2014).
2. Xia, H.-R. *et al.* Organohalide lead perovskite based photodetectors with much enhanced performance. *Chem. Commun.* **50**, 13695–13697 (2014).
3. Hu, X. *et al.* High-Performance Flexible Broadband Photodetector Based on Organolead Halide Perovskite. *Adv. Funct. Mater.* **24**, 7373–7380 (2014).
4. Dou, L. *et al.* Solution-processed hybrid perovskite photodetectors with high detectivity. *Nat. Commun.* **5**, 5404 (2014).
5. Horváth, E. *et al.* Nanowires of methylammonium lead iodide (CH<sub>3</sub>NH<sub>3</sub>PbI<sub>3</sub>) prepared by low temperature solution-mediated crystallization. *Nano Lett.* **14**, 6761–6766 (2014).
6. Guo, Y. *et al.* Air-stable and solution-processable perovskite photodetectors for solar-blind UV and Visible light. *J. Phys. Chem. Lett.* **6**, 535–539 (2015).
7. Lee, Y. *et al.* High-performance perovskite–graphene hybrid photodetector. *Adv. Mater.* **27**, 41–46 (2015).
8. Dong, R. *et al.* High-gain and low-driving-voltage photodetectors based on organolead triiodide perovskites. *Adv. Mater.* **27**, 1912–1918 (2015).
9. Lin, Q. *et al.* Low noise, IR-blind organohalide perovskite photodiodes for visible light detection and imaging. *Adv. Mater.* **27**, 2060–2064 (2015).
10. Fang, Y. *et al.* Resolving weak light of sub-picowatt per square centimeter by hybrid perovskite photodetectors enabled by noise reduction. *Adv. Mater.* **27**, 2804–2810 (2015).
11. Li, D. *et al.* High performance organic-inorganic perovskite-optocoupler based on low-voltage and fast response perovskite compound photodetector. *Sci. Rep.* **5**, 7902 (2015).
12. Deng, H. *et al.* Growth, patterning and alignment of organolead iodide perovskite nanowires for optoelectronic devices. *Nanoscale* **7**, 4163–4170 (2015).
